# Supplementary material for: RPD3 histone deacetylase and nutrition have distinct but interacting effects on Drosophila longevity
Source: PubMed Central journal article supplement (PMC4712336; doi:10.18632/aging.100856), 2015-12-08
Supplement: aging-07-1112-s001.pdf [file aging-07-1112-s001.pdf]

SUPPLEMENTAL FIGURES

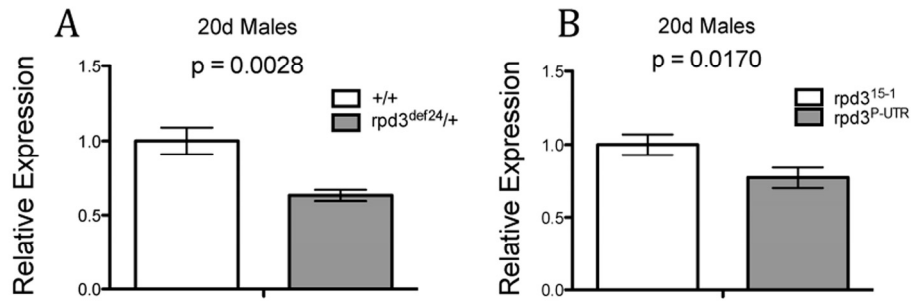

**Supplemental Figure 1. The effect of *rpd3* mutations of *rpd3* mRNA levels.** (A) Q-PCR results showing average *rpd3* mRNA expression in heads and thoraces of 20 day old males, *rpd3*<sup>def24</sup>/+ compared to +/+. (B) Q-PCR results showing average *rpd3* mRNA expression in thoraces of 20 day old males, *rpd3*<sup>P-UTR</sup>/+ compared to *rpd3*<sup>P-1.8</sup>/+. 25 heads or thoraces per replicate.

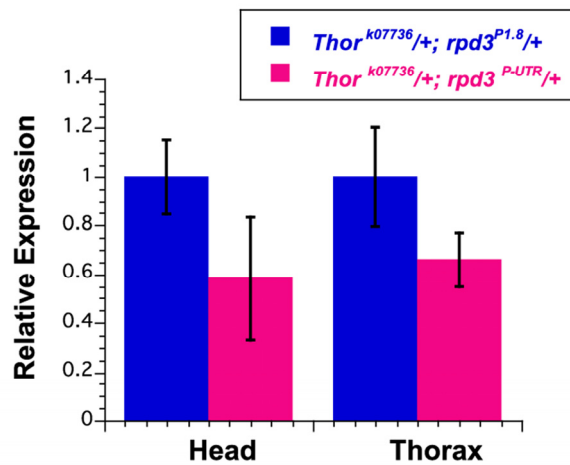

**Supplemental Figure 2. Average expression of mRNA for the *4E-BP* gene in three biological replicates isolated from the heads and thoraces of female flies at 10 days of age by Q-PCR.** Blue, *Thor*<sup>k07736/+</sup>;*rpd3*<sup>P-1.8</sup>/+ controls, magenta, *Thor*<sup>k07736/+</sup>;*rpd3*<sup>P-UTR</sup>/+. Graphs are plotted as the means +/- standard errors.
